# Supplementary material for: Molecular engineering of the last-generation CNTs in smart cancer therapy by grafting PEG–PLGA–riboflavin
Source: Royal Society of Chemistry journal article supplement (doi:10.1039/d0ra07500k), 2020-01-01
Supplement: d0ra07500k1.pdf [file d0ra07500k1.pdf]

## Supplementary information

### Molecular Engineering of the Last-Generation CNTs in Smart Cancer therapy by Grafting PEG–PLGA- Riboflavin

Somayeh Sohrabi<sup>a</sup>, Mohammad Khedri<sup>a</sup>, Reza Maleki<sup>b</sup>, Mostafa Moraveji<sup>a,\*</sup>

<sup>a</sup> Department of Chemical Engineering, Amirkabir University of Technology (Tehran Polytechnic), 424 Hafez Avenue, Tehran, 1591634311, Iran

<sup>b</sup> Computational Biology And Chemistry Group (CBCG), Universal Scientific Education and Research Network (USERN), Tehran, Iran

\*Corresponding author's email: [moraveji@aut.ac.ir](mailto:moraveji@aut.ac.ir)

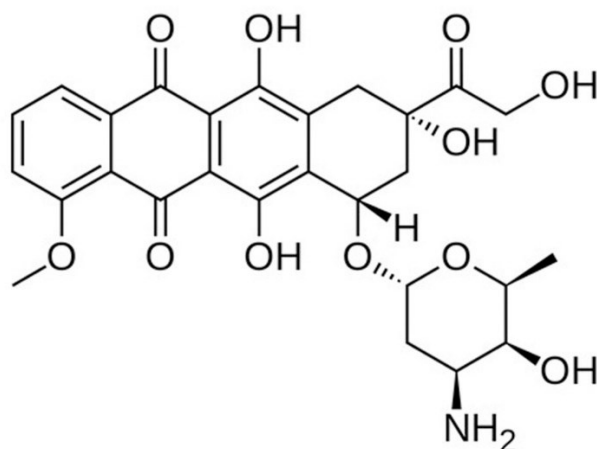

**Supplementary Figure S1.** Chemical structure of doxorubicin (Dox) anticancer drug [1].

Supplementary Table S1.

| Dopant Concentration | Gibss Free Energy |              |
|----------------------|-------------------|--------------|
|                      | N- doped-CNT      | P- doped-CNT |
| 5                    | -7.62             | -9.04        |
| 8                    | -10.36            | -12.14       |
| 10                   | -12.64            | -13.46       |
| 15                   | -11.29            | -11.91       |
| 20                   | -6.57             | -7.89        |

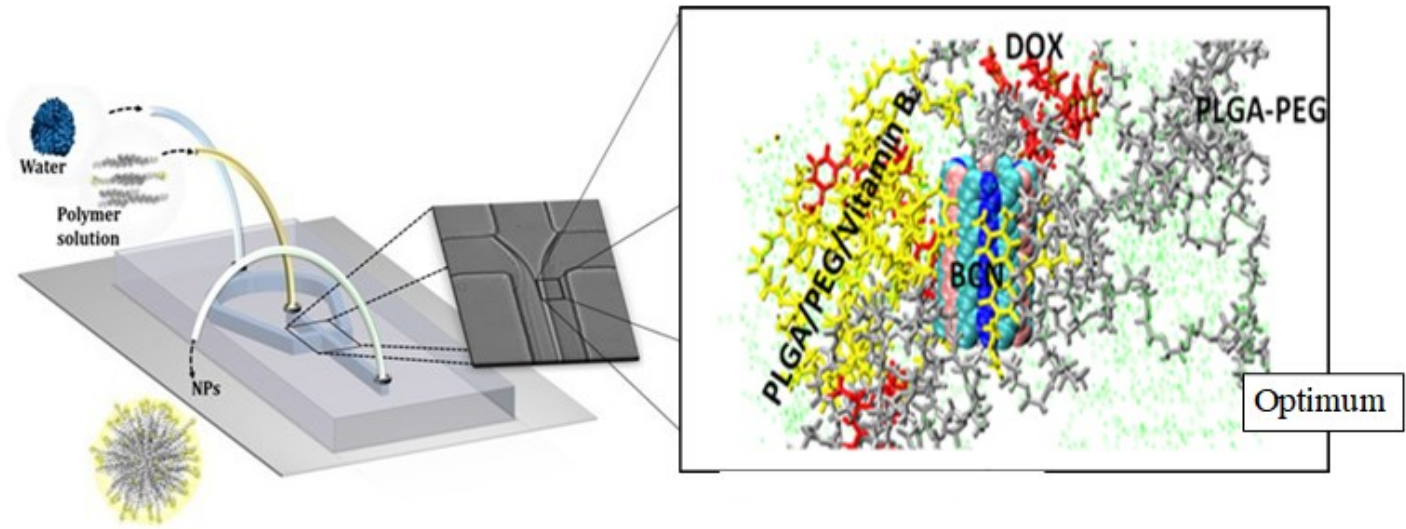

Supplementary Figure S2. The flow-focusing microfluidics system for DOX delivery

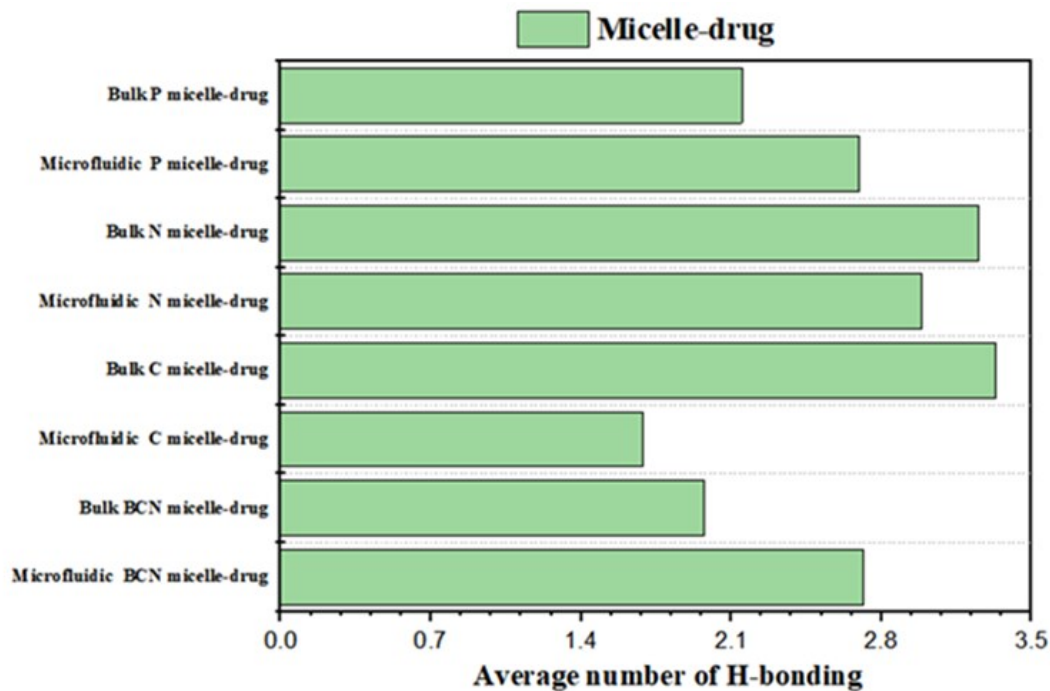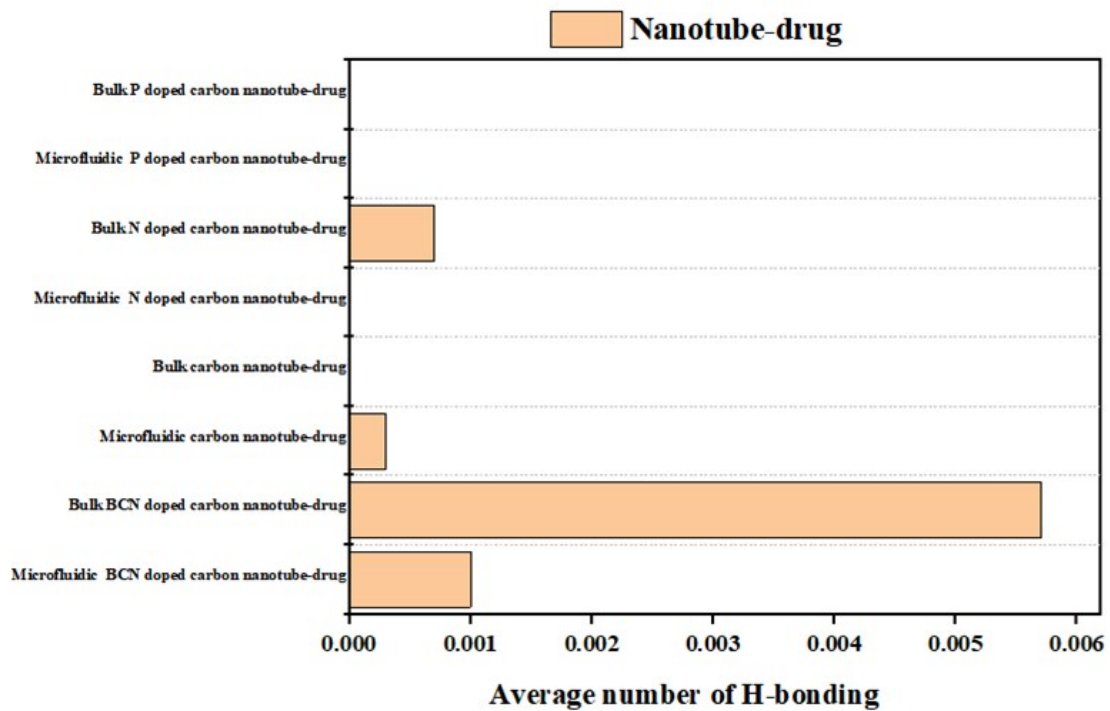

**Supplementary Figure S3.** Average number of hydrogen bonds in PLGA/PEG/RF@ (doped)/DOX in bulk and microfluidic systems

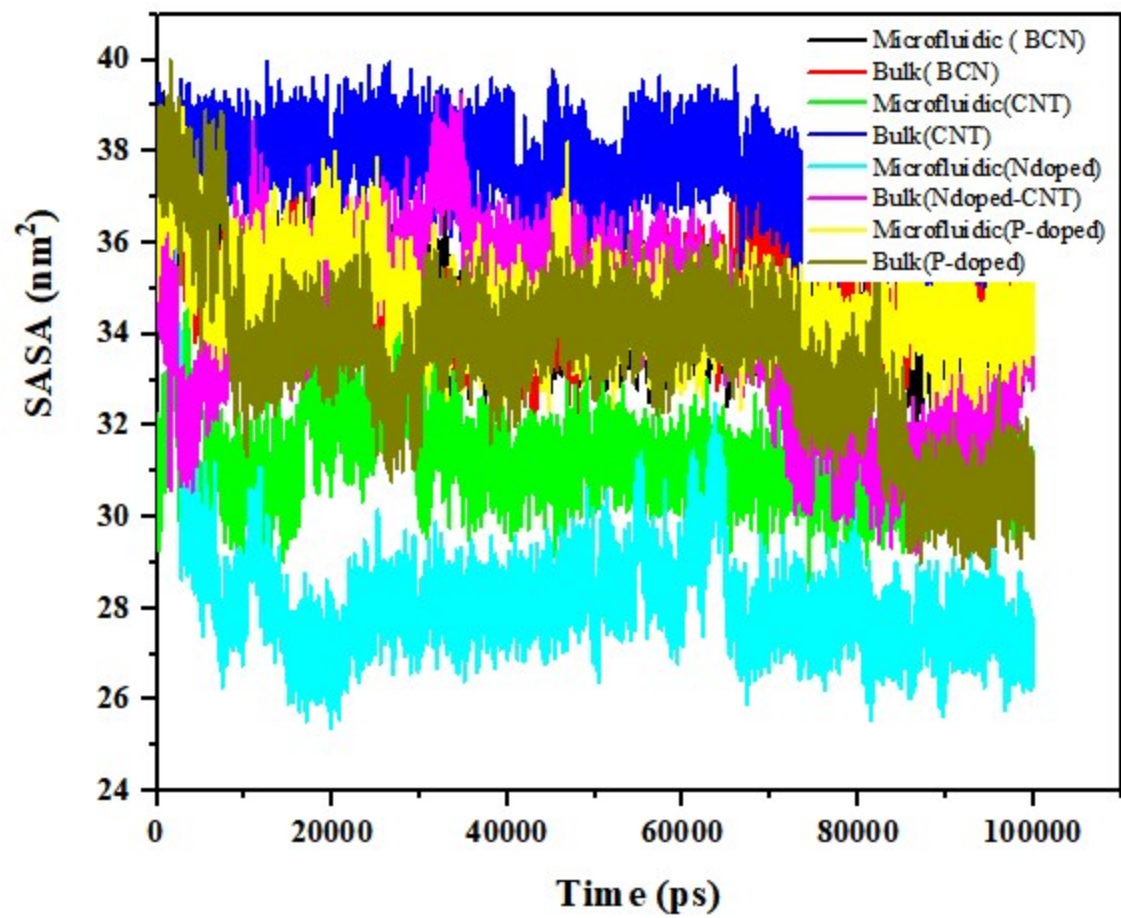

**Supplementary Figure S4.** The SASA trends for DOX in the presence of doped CNT in bulk and microfluidic system
